# Supplementary material for: Influence of Ellagitannins Extracted by Pomegranate Fruit on Disulfide Isomerase PDIA3 Activity
Source: PubMed Central journal article supplement (PMC6356990; doi:10.3390/nu11010186), 2019-01-17

## **Influence of Ellagitannins Extracted by Pomegranate Fruit on Disulfide Isomerase PDIA3 Activity**

Fabio Altieri <sup>1,4</sup>, Francesco Cairone <sup>2</sup>, Flavia Giamogante <sup>1</sup>, Simone Carradori <sup>3,\*</sup>, **Marcello Locatelli** <sup>3</sup>, Silvia Chichiarelli <sup>1</sup> and Stefania Cesa <sup>2,\*</sup>

<sup>1</sup> Dipartimento di Scienze Biochimiche "A. Rossi Fanelli", Sapienza University "", Piazzale A. Moro 5, 00185, Rome, Italy; [fabio.altieri@uniroma1.it](mailto:fabio.altieri@uniroma1.it) (F.A.), [flavia.giamogante@uniroma1.it](mailto:flavia.giamogante@uniroma1.it) (F.G.), [silvia.chichiarelli@uniroma1.it](mailto:silvia.chichiarelli@uniroma1.it) (S.Ch.)

<sup>2</sup> Dipartimento di Chimica e Tecnologie del Farmaco, Università degli Studi di Roma "La Sapienza", Piazzale Aldo Moro, 5 - 00185 Roma, Italy; [francesco.cairone@uniroma1.it](mailto:francesco.cairone@uniroma1.it) (F.C.), [stefania.cesa@uniroma1.it](mailto:stefania.cesa@uniroma1.it) (S.Ce.)

<sup>3</sup> Dipartimento di Farmacia, Università "G. d'Annunzio" di Chieti-Pescara, Via dei Vestini, 31 - 66100 Chieti, Italy ; [simone.carradori@unich.it](mailto:simone.carradori@unich.it) (S.C.); [marcello.locatelli@unich.it](mailto:marcello.locatelli@unich.it) (M.L.)

<sup>4</sup> Istituto Pasteur-Fondazione Cenci Bolognetti, Italy

\* Correspondence: [simone.carradori@unich.it](mailto:simone.carradori@unich.it); Tel.: +39-0871-3554583 (S.C.), [stefania.cesa@uniroma1.it](mailto:stefania.cesa@uniroma1.it); Tel.: + 39-06-49913198; fax: + 39-06-49913133 (S.Ce.)

### **Materials**

Chemical standards: gallic acid, catechin, chlorogenic acid, 4-hydroxybenzoic acid, vanillic acid, epicatechin, syringic acid, 3-hydroxybenzoic acid, 3-hydroxy-4-methoxybenzaldehyde, *p*-coumaric acid, rutin, sinapinic acid, *t*-ferulic acid, naringin, 2,3-dimethoxybenzoic acid, benzoic acid, *o*-coumaric acid, quercetin, 8-cinnamoyl harpagide (harpagoside), *t*-cinnamic acid, naringenin, and carvacrol (> 98%) were purchased from Sigma-Aldrich (Milan, Italy). Solvents (acetonitrile (HPLC-grade), methanol (HPLC-grade), acetic acid (≥ 99%)) were obtained from Carlo Erba Reagents (Milan, Italy). Centrifuge model 5804 (Eppendorf, Hamburg, Germany), vortex (VELP Scientifica Srl, Usmate, Italy), and ultrasound bath (Falc Instruments, Treviglio, Italy) were used as additional equipment.

### **HPLC analysis**

HPLC-PDA analyses were performed using an HPLC Waters liquid chromatography (model 600 solvent pump, 2996 PDA). Mobile phase was directly degassed *on-line* using a Biotech 4CH DEGASI Compact (Onsala, Sweden). Empower v.2 Software (Waters Spa, Milford, MA, USA) was used to collect and analyze data. The analyses were carried out using gradient elution mode on a C18 reversed-phase column (Prodigy ODS(3), 4.6 x 150 mm, 5 μm; Phenomenex, Torrance, CA), thermostated at 30 °C (± 1 °C). The gradient elution was achieved by a solution of water-acetonitrile (93:7 ratio, with 3% of acetic acid) as initial conditions, and the complete separation was achieved in 60 min. Chemical standards chromatogram (@ 278 nm as example of wavelength in which all compounds show absorbance) for the analytes, with a table reporting the retention

times and the maximum wavelengths used for the quantitative analyses. A table with gradient elution program used for the analyses was also reported.

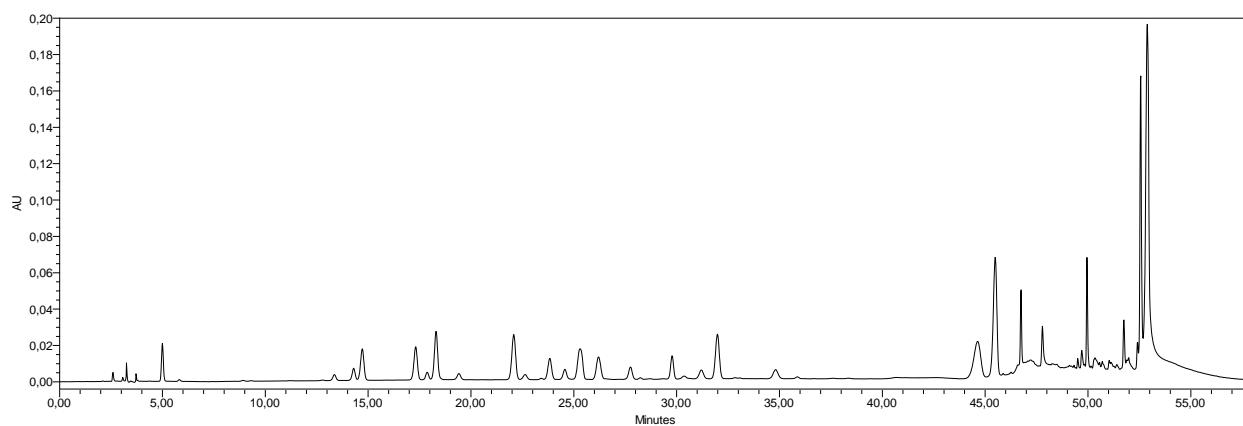

Gradient elution:

| <b>TIME<br/>(min)</b> | <b>FLOW (mL<br/>min<sup>-1</sup>)</b> | <b>%A</b> | <b>%B</b> |
|-----------------------|---------------------------------------|-----------|-----------|
| 0                     |                                       | 93        | 7         |
| 0.1                   |                                       | 93        | 7         |
| 30                    |                                       | 72        | 28        |
| 38                    |                                       | 75        | 25        |
| 45                    | 1                                     | 2         | 98        |
| 47                    |                                       | 2         | 98        |
| 48                    |                                       | 93        | 7         |
| 58                    |                                       | 93        | 7         |

Analytes, retention times, and maximum wavelengths used for quantitative analyses:

| Analytes                        | Retention times (min) | $\lambda$ max |
|---------------------------------|-----------------------|---------------|
| Gallic acid                     | 4.99                  | 271 nm        |
| Catechin                        | 13.36                 | 278 nm        |
| Chlorogenic acid                | 14.29                 | 324 nm        |
| 4-hydroxybenzoic acid           | 14.71                 | 256 nm        |
| Vanillic acid                   | 17.31                 | 260 nm        |
| Epicatechin                     | 18.30                 | 278 nm        |
| Syringic acid                   | 18.50                 | 274 nm        |
| 3-hydroxybenzoic acid           | 19.41                 | 275 nm        |
| 3-hydroxy-4-methoxybenzaldehyde | 22.08                 | 278 nm        |
| <i>p</i> -coumaric acid         | 22.65                 | 310 nm        |
| Rutin                           | 25.38                 | 256 nm        |
| Sinapinic acid                  | 26.18                 | 324 nm        |
| <i>t</i> -ferulic acid          | 27.75                 | 315 nm        |
| Naringin                        | 29.78                 | 285 nm        |
| 2,3-dimethoxybenzoic acid       | 30.36                 | 299 nm        |
| Benzoic acid                    | 31.20                 | 275 nm        |
| <i>o</i> -coumaric acid         | 34.81                 | 276 nm        |
| Quercetin                       | 40.57                 | 367 nm        |
| 8-cinnamoyl harpagide           | 45.49                 | 280 nm        |
| <i>t</i> -cinnamic acid         | 45.87                 | 276 nm        |
| Naringenin                      | 46.74                 | 290 nm        |
| Carvacrol                       | 49.95                 | 275 nm        |

In the following tables are reported the results in terms of  $\mu\text{g}/\text{mg}$ . In the tables are reported standard deviations of three independent measurements.

**Table S1. Multi-component phenolic pattern of DC cultivars.**

| CONCENTRATION ( $\mu\text{g}/\text{mg}$ )         | F-DC <sub>1</sub> | C-DC <sub>1</sub> | S-DC <sub>1</sub> | P-DC <sub>1</sub> | F-DC <sub>2</sub> | C-DC <sub>2</sub> | S-DC <sub>2</sub> | P-DC <sub>2</sub> |
|---------------------------------------------------|-------------------|-------------------|-------------------|-------------------|-------------------|-------------------|-------------------|-------------------|
| Gallic acid                                       |                   |                   |                   |                   |                   |                   |                   |                   |
| Catechin                                          |                   |                   |                   |                   | 4.2 $\pm$ 0.3     |                   |                   |                   |
| Chlorogenic acid                                  |                   |                   |                   |                   |                   |                   |                   |                   |
| <i>p</i> -OH benzoic acid                         |                   |                   |                   |                   |                   |                   |                   |                   |
| Vanillic acid                                     |                   |                   |                   |                   |                   |                   |                   |                   |
| Epicatechin                                       |                   |                   |                   |                   |                   |                   |                   |                   |
| Syringic acid                                     |                   |                   |                   |                   |                   |                   |                   |                   |
| 3-OH benzoic acid                                 |                   |                   |                   | BLQ               |                   |                   |                   |                   |
| 3-OH-4-MeO benzaldehyde                           |                   |                   |                   | 3.5 $\pm$ 0.1     |                   |                   |                   |                   |
| <i>p</i> -coumaric acid                           |                   |                   |                   |                   |                   |                   |                   |                   |
| Rutin                                             | 1.66 $\pm$ 0.14   |                   | BLD               | 14.3 $\pm$ 1.4    | 5.1 $\pm$ 0.2     |                   |                   |                   |
| Sinapinic acid                                    |                   |                   |                   |                   |                   |                   |                   |                   |
| <i>t</i> -ferulic acid                            |                   |                   |                   |                   |                   |                   |                   |                   |
| Naringin                                          |                   |                   |                   |                   |                   |                   |                   |                   |
| 2,3-diMeO benzoic acid                            |                   |                   |                   |                   |                   |                   |                   |                   |
| Benzoic acid                                      |                   |                   |                   |                   |                   |                   |                   |                   |
| <i>o</i> -coumaric acid                           |                   |                   |                   |                   |                   |                   |                   |                   |
| Quercetin                                         |                   |                   |                   |                   |                   |                   |                   |                   |
| Harpagoside                                       |                   |                   |                   |                   |                   |                   |                   |                   |
| <i>t</i> -cinnamic acid                           |                   |                   |                   |                   |                   |                   |                   |                   |
| Naringenin                                        |                   |                   |                   |                   |                   |                   |                   |                   |
| Carvacrol                                         |                   |                   |                   |                   |                   |                   |                   |                   |
| <b>Total (<math>\mu\text{g}/\text{mg}</math>)</b> | <b>1.66</b>       | <b>0.00</b>       | <b>0.00</b>       | <b>17.75</b>      | <b>9.23</b>       | <b>0.00</b>       | <b>0.00</b>       | <b>0.00</b>       |

**Table S2. Multi-component phenolic pattern of Mz cultivar.**

| CONCENTRATION ( $\mu\text{g}/\text{mg}$ )         | F-Mz            | P-Mz            |
|---------------------------------------------------|-----------------|-----------------|
| Gallic acid                                       |                 |                 |
| Catechin                                          | 2.8 $\pm$ 0.3   | 5.0 $\pm$ 0.1   |
| Chlorogenic acid                                  |                 |                 |
| <i>p</i> -OH benzoic acid                         |                 |                 |
| Vanillic acid                                     | 0.32 $\pm$ 0.03 |                 |
| Epicatechin                                       |                 |                 |
| Syringic acid                                     |                 |                 |
| 3-OH benzoic acid                                 |                 |                 |
| 3-OH-4-MeO benzaldehyde                           |                 |                 |
| <i>p</i> -coumaric acid                           |                 |                 |
| Rutin                                             | 3.8 $\pm$ 0.2   | 6.1 $\pm$ 0.6   |
| Sinapinic acid                                    |                 |                 |
| <i>t</i> -ferulic acid                            |                 |                 |
| Naringin                                          |                 |                 |
| 2,3-diMeO benzoic acid                            |                 | 0.56 $\pm$ 0.06 |
| Benzoic acid                                      |                 | 0.30 $\pm$ 0.02 |
| <i>o</i> -coumaric acid                           |                 |                 |
| Quercetin                                         |                 |                 |
| Harpagoside                                       |                 |                 |
| <i>t</i> -cinnamic acid                           |                 |                 |
| Naringenin                                        |                 |                 |
| Carvacrol                                         |                 |                 |
| <b>Total (<math>\mu\text{g}/\text{mg}</math>)</b> | <b>6.92</b>     | <b>11.97</b>    |

*F*-DC<sub>1</sub> (@278 nm as example of wavelength in which all compounds show absorbance)

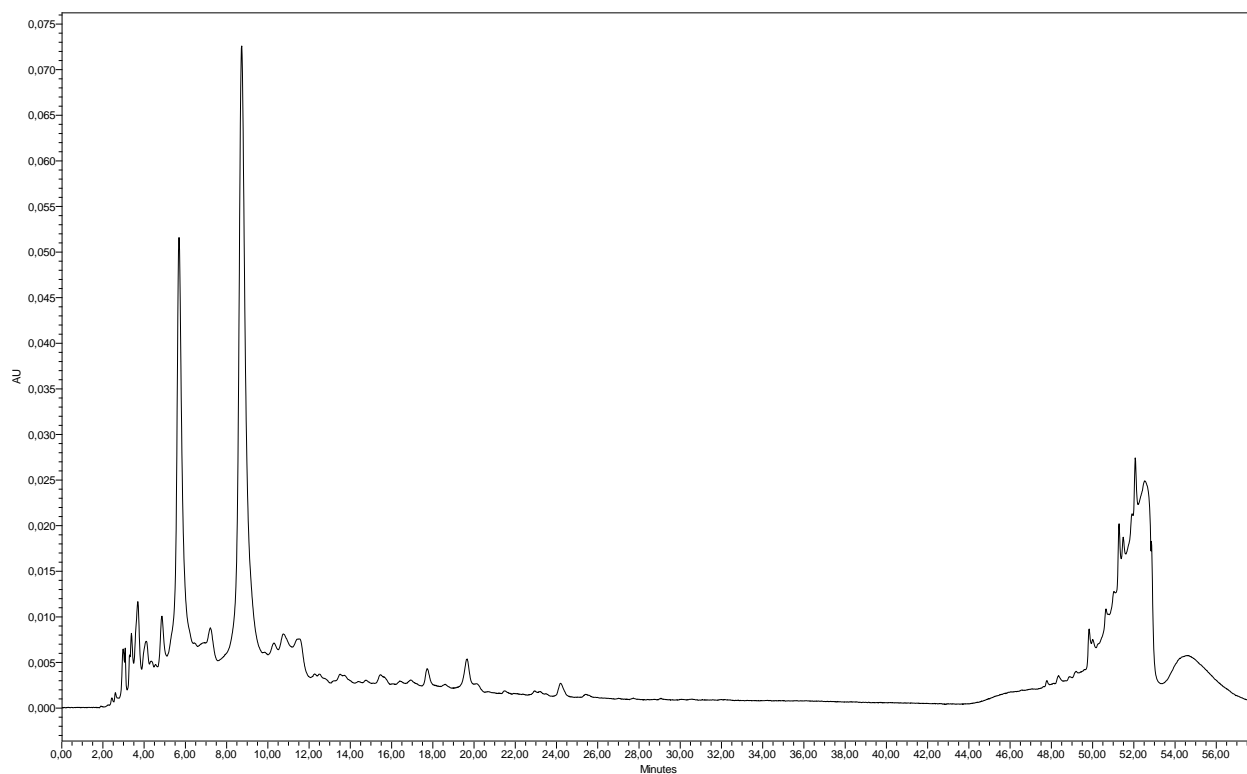

*C*-DC<sub>1</sub> (@278 nm as example of wavelength in which all compounds show absorbance)

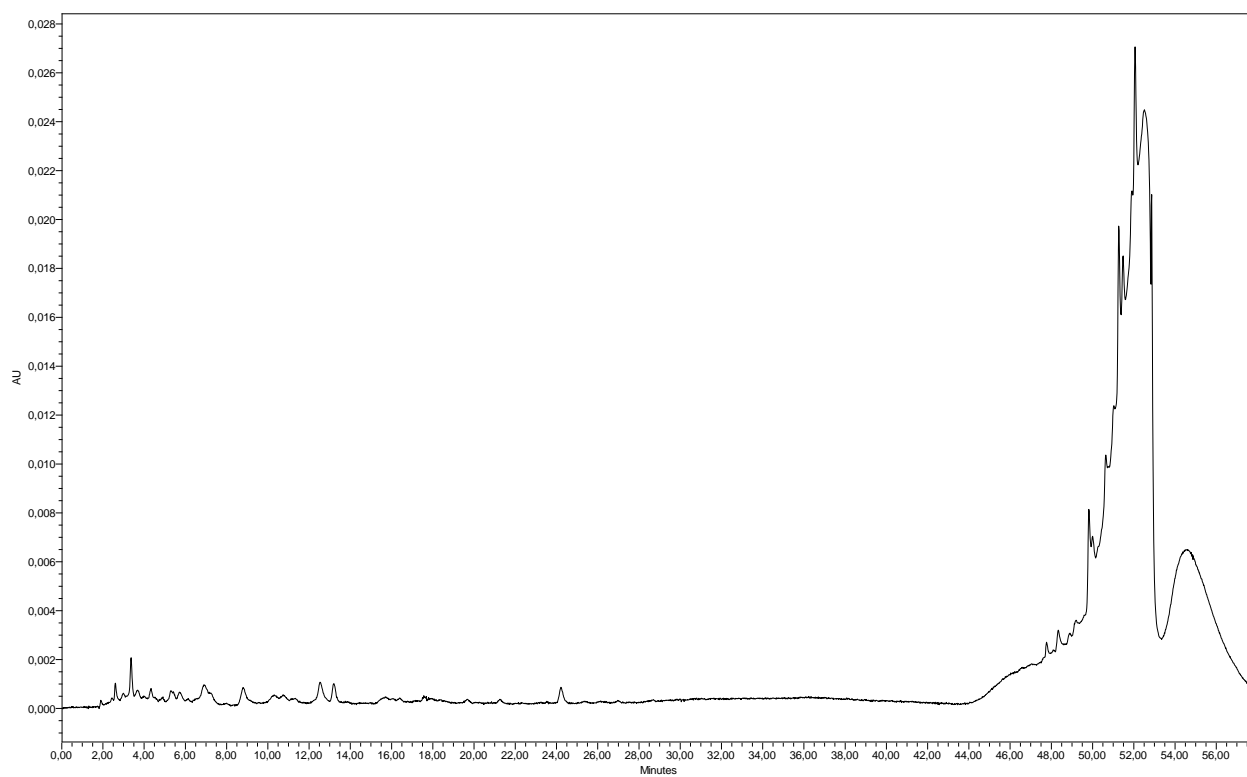

*S*-DC<sub>1</sub> (@278 nm as example of wavelength in which all compounds show absorbance)

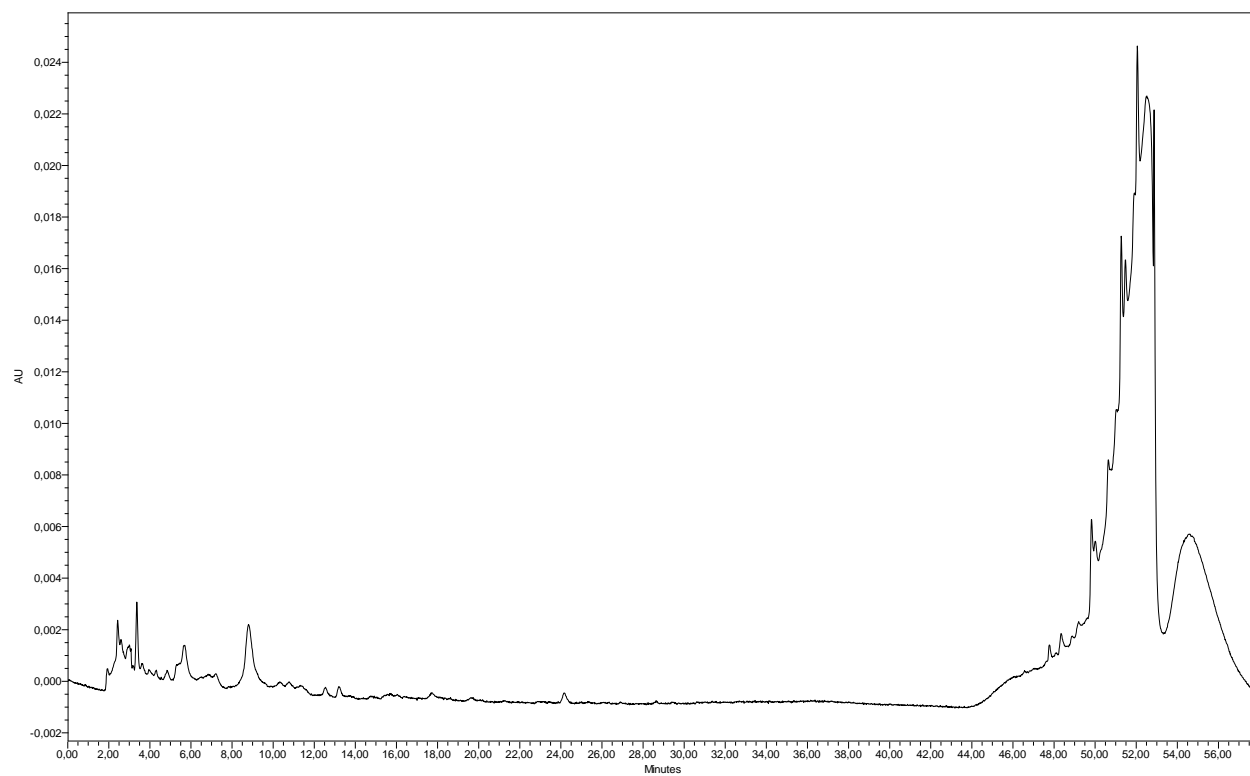

*P*-DC<sub>1</sub> (@278 nm as example of wavelength in which all compounds show absorbance)

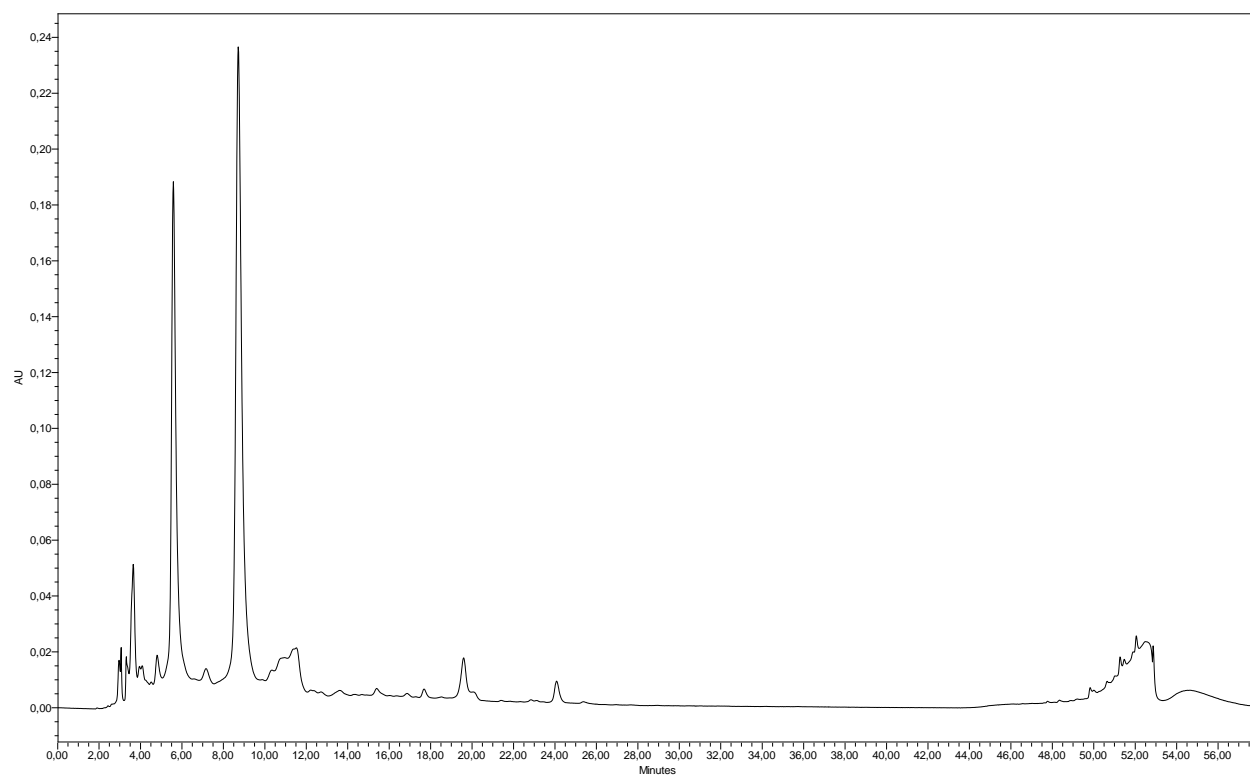

*F*-DC<sub>2</sub> (@278 nm as example of wavelength in which all compounds show absorbance)

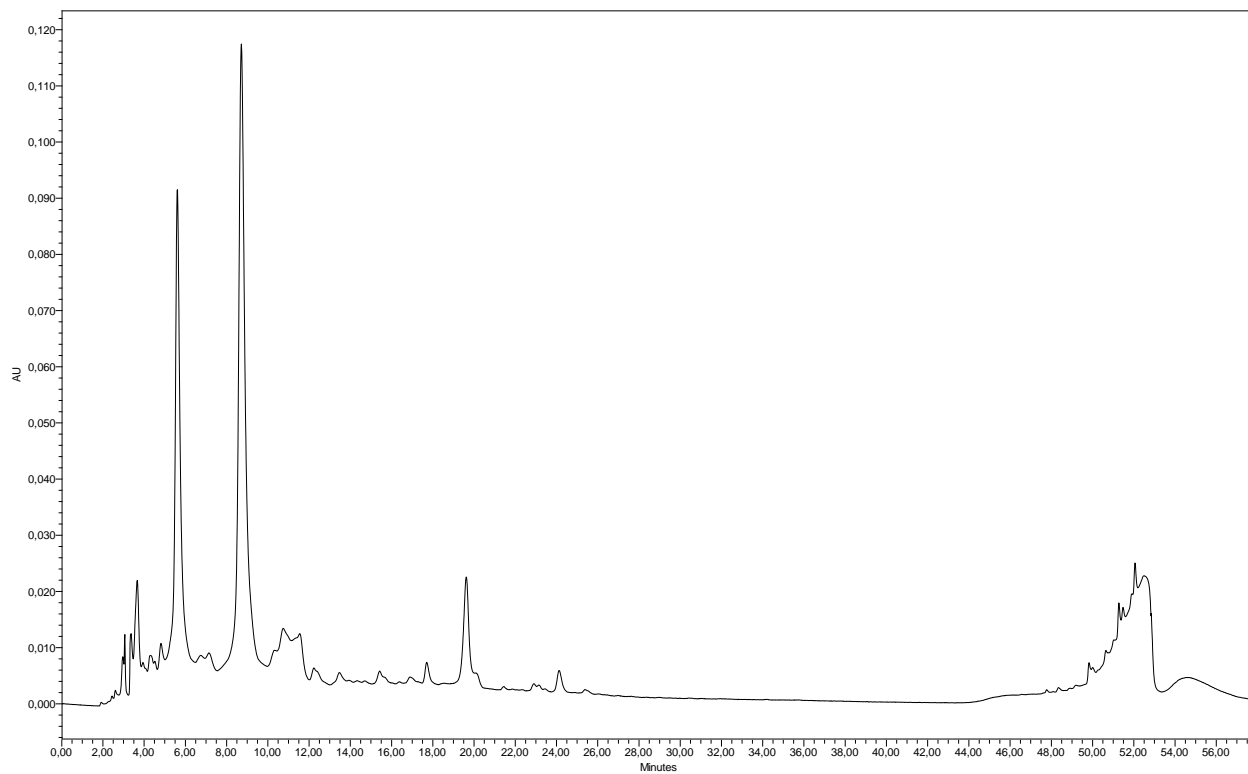

*C*-DC<sub>2</sub> (@278 nm as example of wavelength in which all compounds show absorbance)

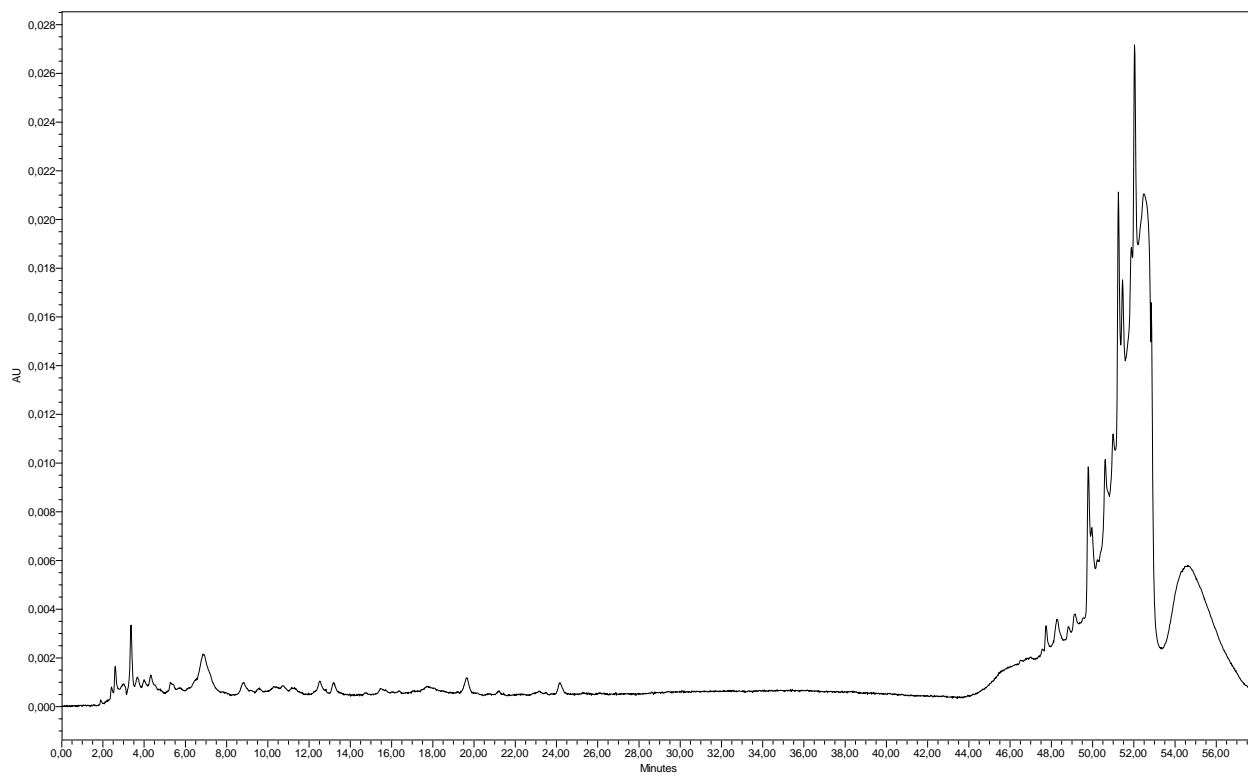

*S*-DC<sub>2</sub> (@278 nm as example of wavelength in which all compounds show absorbance)

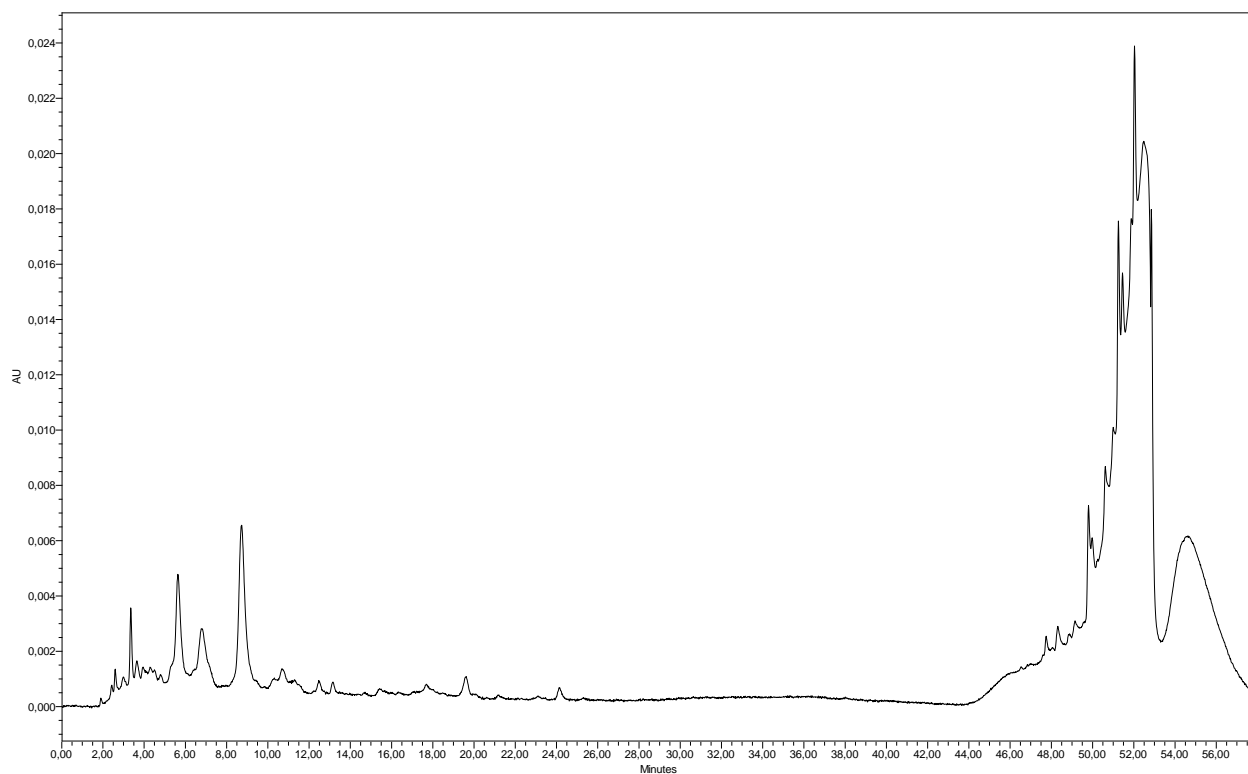

*P*-DC<sub>2</sub> (@278 nm as example of wavelength in which all compounds show absorbance)

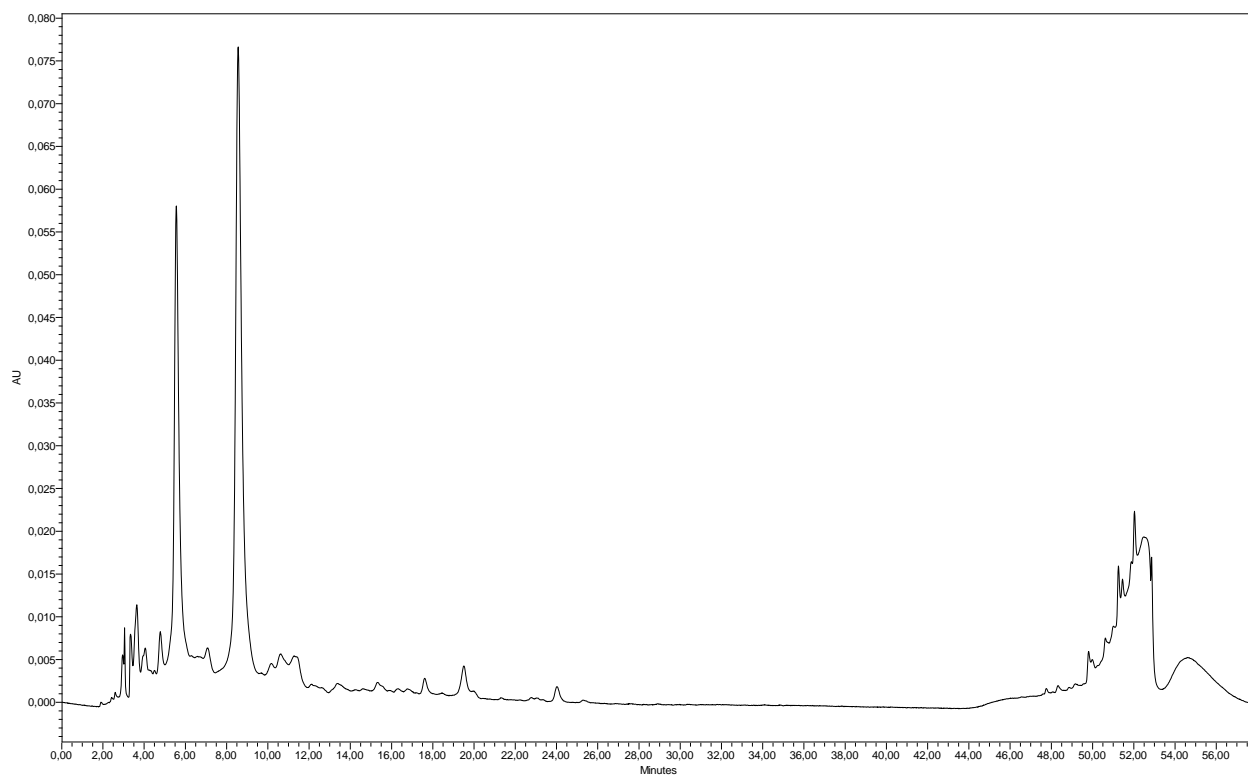



*F*-Mz (@278 nm as example of wavelength in which all compounds show absorbance)

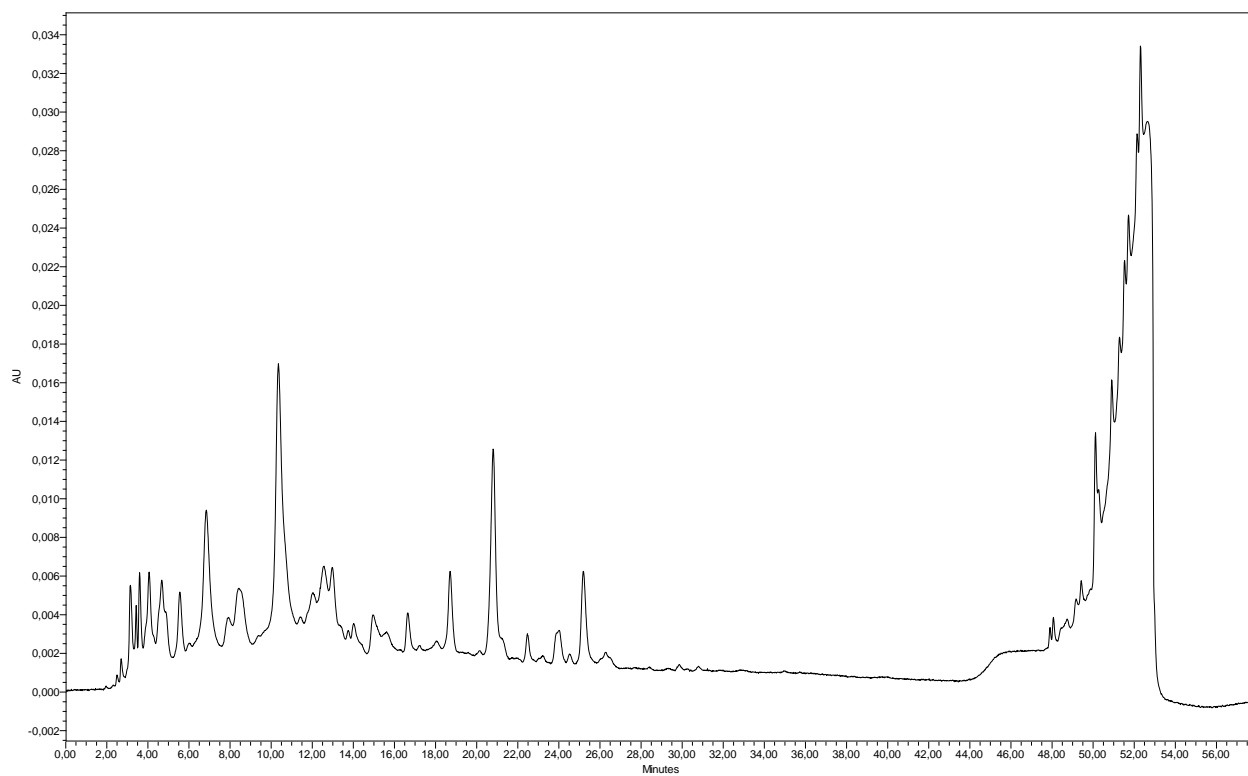

*P*-Mz (@278 nm as example of wavelength in which all compounds show absorbance)

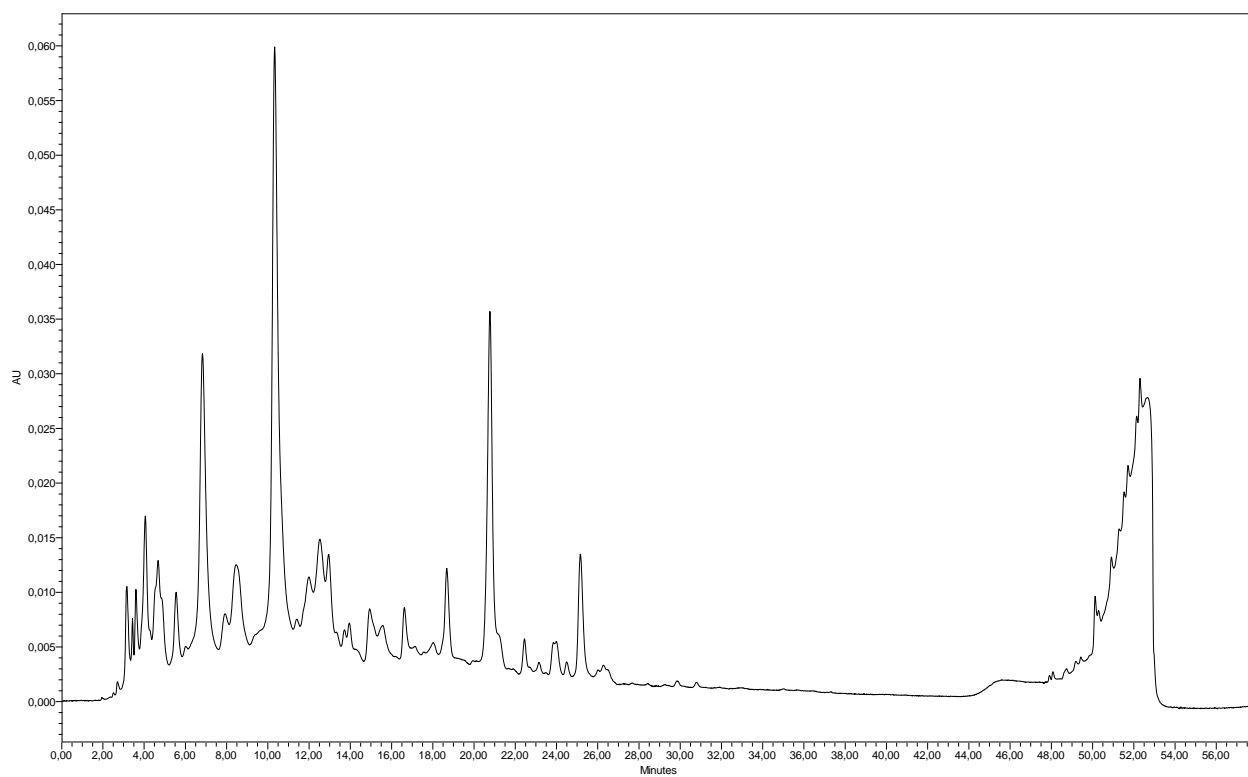

Supplement: nutrients-11-00186-s001.pdf [file nutrients-11-00186-s001.pdf]
